# Supplementary material for: Diet and endometrial cancer: a focus on the role of fruit and vegetable intake, Mediterranean diet and dietary inflammatory index in the endometrial cancer risk
Source: Springer Nature journal article supplement (doi:10.1186/s12885-017-3754-y), 2017-11-13
Supplement: MOESM1 [file 15220250]

**Supplementary Table 1. Odds ratios (OR) and 95% confidence Intervals (CI) by fruit and vegetable quintiles, Mediterranean diet index, and dietary inflammation index quintiles.**

\*univariate analysis

\*\*multivariate logistic regression models adjusted for age, parity, menopausal status, hormone replacement therapy use, oral contraceptive use, body mass index, age at menarche, physical activity, education, smoking status, and total energy intake.

| Normal weight (BMI <25)              |           |           |               |           | Overweith (BMI 25-30)           |           |           |               |           | Obese (BMI >30)                 |           |           |               |           |
|--------------------------------------|-----------|-----------|---------------|-----------|---------------------------------|-----------|-----------|---------------|-----------|---------------------------------|-----------|-----------|---------------|-----------|
|                                      | Crude OR* | 95% CI    | Adjusted OR** | 95% CI    |                                 | Crude OR* | 95% CI    | Adjusted OR** | 95% CI    |                                 | Crude OR* | 95% CI    | Adjusted OR** | 95% CI    |
| <b>FRUIT</b>                         |           |           |               |           |                                 |           |           |               |           |                                 |           |           |               |           |
| 1 <sup>st</sup> quintile             | Reference | -         | Reference     | -         | 1 <sup>st</sup> quintile        | Reference | -         | Reference     | -         | 1 <sup>st</sup> quintile        | Reference | -         | Reference     | -         |
| 2 <sup>nd</sup> quintile             | 1.20      | 0.56-2.61 | 0.89          | 0.38-2.07 | 2 <sup>nd</sup> quintile        | 0.81      | 0.34-1.98 | 1.03          | 0.36-2.98 | 2 <sup>nd</sup> quintile        | 0.46      | 0.16-1.33 | 0.33          | 0.08-1.33 |
| 3 <sup>rd</sup> quintile             | 0.94      | 0.43-2.05 | 0.74          | 0.31-1.79 | 3 <sup>rd</sup> quintile        | 0.81      | 0.33-2.00 | 0.62          | 0.22-1.78 | 3 <sup>rd</sup> quintile        | 0.39      | 0.12-1.19 | 0.38          | 0.08-1.73 |
| 4 <sup>th</sup> quintile             | 0.72      | 0.32-1.59 | 0.41          | 0.16-1.06 | 4 <sup>th</sup> quintile        | 0.94      | 0.40-2.23 | 1.40          | 0.48-4.06 | 4 <sup>th</sup> quintile        | 0.88      | 0.25-3.15 | 0.43          | 0.09-2.07 |
| 5 <sup>th</sup> quintile             | 1.00      | 0.46-2.20 | 0.72          | 0.28-1.85 | 5 <sup>th</sup> quintile        | 0.37      | 0.14-0.99 | 0.70          | 0.20-2.42 | 5 <sup>th</sup> quintile        | 0.35      | 0.10-1.16 | 0.29          | 0.06-1.45 |
| p-value for trend                    | 0.58      |           | 0.19          |           | p-value for trend               | 0.13      |           | 0.85          |           | p-value for trend               | 0.23      |           | 0.24          |           |
| <b>VEGETABLES</b>                    |           |           |               |           |                                 |           |           |               |           |                                 |           |           |               |           |
| 1 <sup>st</sup> quintile             | Reference | -         | Reference     | -         | 1 <sup>st</sup> quintile        | Reference | -         | Reference     | -         | 1 <sup>st</sup> quintile        | Reference | -         | Reference     | -         |
| 2 <sup>nd</sup> quintile             | 0.87      | 0.42-1.77 | 0.77          | 0.34-1.77 | 2 <sup>nd</sup> quintile        | 2.47      | 1.04-5.84 | 3.12          | 1.16-8.38 | 2 <sup>nd</sup> quintile        | 1.04      | 0.29-3.69 | 0.73          | 0.18-2.96 |
| 3 <sup>rd</sup> quintile             | 0.55      | 0.25-1.24 | 0.41          | 0.17-1.02 | 3 <sup>rd</sup> quintile        | 1.02      | 0.40-2.58 | 1.71          | 0.59-4.99 | 3 <sup>rd</sup> quintile        | 0.28      | 0.09-0.86 | 0.31          | 0.08-1.26 |
| 4 <sup>th</sup> quintile             | 0.75      | 0.35-1.61 | 0.54          | 0.21-1.38 | 4 <sup>th</sup> quintile        | 1.08      | 0.43-2.72 | 1.40          | 0.48-4.10 | 4 <sup>th</sup> quintile        | 0.27      | 0.08-0.84 | 0.27          | 0.06-1.24 |
| 5 <sup>th</sup> quintile             | 0.29      | 0.12-0.70 | 0.32          | 0.11-0.92 | 5 <sup>th</sup> quintile        | 0.42      | 0.14-1.31 | 0.49          | 0.13-1.81 | 5 <sup>th</sup> quintile        | 0.20      | 0.05-0.73 | 0.26          | 0.04-1.56 |
| p-value for trend                    | 0.01      |           | 0.02          |           | p-value for trend               | 0.03      |           | 0.16          |           | p-value for trend               | 0.001     |           | 0.06          |           |
| <b>MEDITERRANEAN DIET INDEX</b>      |           |           |               |           |                                 |           |           |               |           |                                 |           |           |               |           |
| Low adherence (0-3 habits)           | Reference | -         | Reference     | -         | Low adherence (0-3 habits)      | Reference | -         | Reference     | -         | Low adherence (0-3 habits)      | Reference | -         | Reference     | -         |
| Moderate adherence (4-5 habits)      | 0.74      | 0.43-1.28 | 0.75          | 0.41-1.39 | Moderate adherence (4-5 habits) | 0.48      | 0.26-0.90 | 0.54          | 0.34-2.53 | Moderate adherence (4-5 habits) | 0.47      | 0.21-1.04 | 0.37          | 0.14-0.99 |
| High adherence (6-8 habits)          | 0.38      | 0.16-0.89 | 0.33          | 0.13-0.84 | High adherence (6-8 habits)     | 0.65      | 0.27-1.54 | 0.93          | 0.34-2.53 | High adherence (6-8 habits)     | 0.31      | 0.09-1.09 | 0.37          | 0.07-2.07 |
| p-value for trend                    | 0.03      |           | 0.03          |           | p-value for trend               | 0.11      |           | 0.45          |           | p-value for trend               | 0.03      |           | 0.06          |           |
| <b>DIETARY INDEX OF INFLAMMATION</b> |           |           |               |           |                                 |           |           |               |           |                                 |           |           |               |           |
| 1 <sup>st</sup> quintile             | Reference | -         | Reference     | -         | 1 <sup>st</sup> quintile        | Reference | -         | Reference     | -         | 1 <sup>st</sup> quintile        | Reference | -         | Reference     | -         |
| 2 <sup>nd</sup> quintile             | 1.19      | 0.51-2.74 | 2.35          | 0.82-6.73 | 2 <sup>nd</sup> quintile        | 2.14      | 0.81-5.63 | 2.55          | 0.78-8.37 | 2 <sup>nd</sup> quintile        | 2.06      | 0.65-6.51 | 1.97          | 0.45-8.69 |
| 3 <sup>rd</sup> quintile             | 0.70      | 0.30-1.64 | 1.11          | 0.34-3.60 | 3 <sup>rd</sup> quintile        | 2.97      | 1.10-7.99 | 4.37          | 1.18-16.2 | 3 <sup>rd</sup> quintile        | 3.71      | 1.02-13.5 | 2.37          | 0.46-12.2 |
| 4 <sup>th</sup> quintile             | 1.01      | 0.42-2.41 | 1.74          | 0.48-6.36 | 4 <sup>th</sup> quintile        | 2.40      | 0.96-6.01 | 3.77          | 0.94-15.2 | 4 <sup>th</sup> quintile        | 3.12      | 0.95-10.2 | 2.96          | 0.47-18.5 |
| 5 <sup>th</sup> quintile             | 0.88      | 0.38-2.01 | 1.56          | 0.37-6.54 | 5 <sup>th</sup> quintile        | 3.65      | 1.32-10.1 | 4.46          | 0.82-24.3 | 5 <sup>th</sup> quintile        | 2.62      | 0.87-7.88 | 1.72          | 0.21-14.3 |
| p-value for trend                    | 0.63      |           | 0.86          |           | p-value for trend               | 0.02      |           | 0.11          |           | p-value for trend               | 0.08      |           | 0.55          |           |
